# Supplementary material for: Quantitative visualization of endocytic trafficking through photoactivation of fluorescent proteins
Source: PubMed Central journal article supplement — Mol Biol Cell. 2021 Apr 19;32(9):892–902. doi: 10.1091/mbc.E20-10-0669 (PMC8108533; doi:10.1091/mbc.e20-10-0669), 2021-04-19
Supplement: mbc-32-892-s001.pdf [file mbc-32-892-s001.pdf]

# Supplemental Materials

*Molecular Biology of the Cell*

Ecker *et al.*

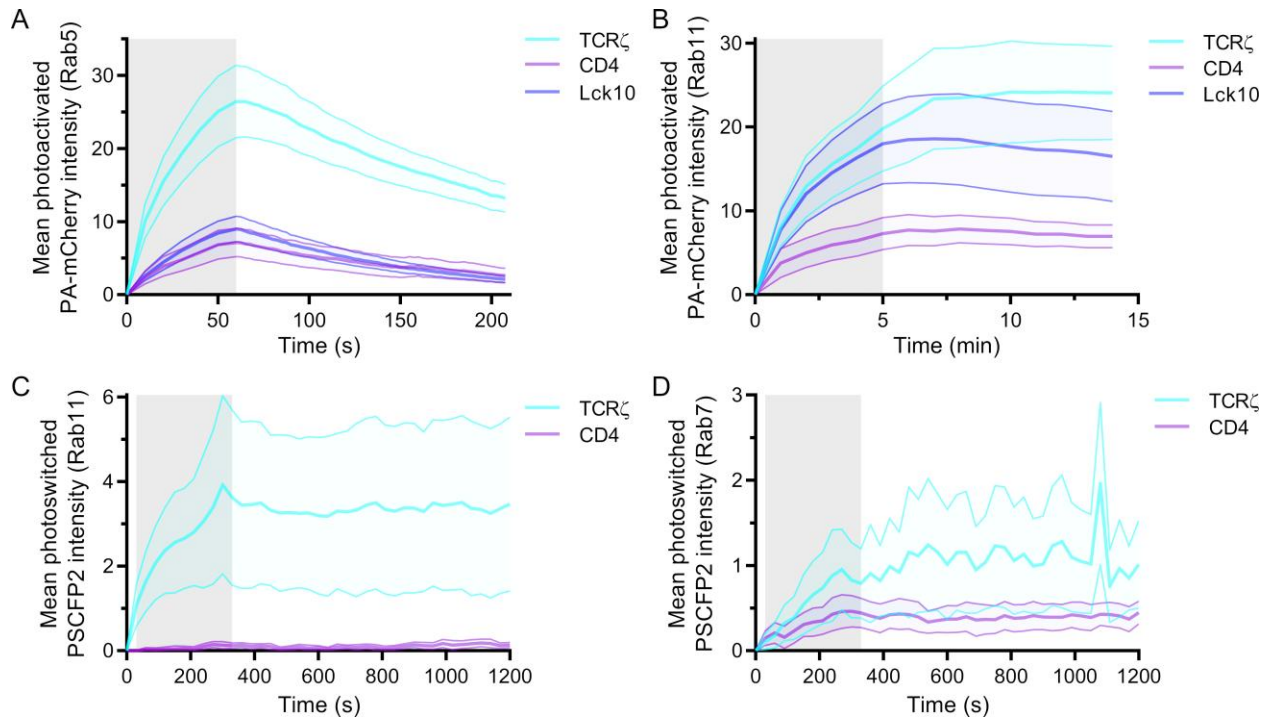

**FIGURE S1:** Intensity of photoactivatable fluorescent proteins following photoactivation. A: Quantification of PA-mCherry intensity over pre-photoactivation baseline in Rab5 co-transfected cells corresponding to Figure 2. B: Quantification of PA-mCherry intensity over pre-photoactivation baseline in Rab11 co-transfected cells corresponding to Figure 2. C: Quantification of PSCFP2 intensity over pre-photoactivation baseline in Rab11 co-transfected cells corresponding to Figures 4 and 5. D: Quantification of PSCFP2 intensity over pre-photoactivation baseline in Rab7 co-transfected cells corresponding to Figures 4 and 5. Shaded regions represent photoactivation timeframe. Error bars represent mean  $\pm$  SEM means of 4 independent experiments of 3-6 cells (A, B) and 4 independent experiments of 1-2 cells (C,D).
